# Supplementary material for: Association of Physical Activity with Colorectal Cancer Risk: Stratified Analyses in a Prospective Cohort
Source: Research Square preprint supplement (doi:10.21203/rs.3.rs-7788690/v1), 2025-11-13
Supplement: Supplementary file 1 [file e985293fc4fa6bfba96dbb20.docx]

Supplementary Tables

**Table S1.** Selected characteristics of cohort population and CRC cases

**Table S2.** Participant characteristics by PA level in KMCC population

**Table S3.** Participant characteristics by OPA in KMCC population

**Table S4.** Distribution of occupation by NOPA percentile groups

**Table S1.** Selected characteristics of cohort population and CRC cases

|  | Total cohort | CRC cases | *p*-value1 |
| --- | --- | --- | --- |
|  | **Mean (SD)** | **Mean (SD)** |  |
| Age | 52.04 (15.01) | 60.84 (10.22) | < 0.01 |
| BMI | 23.32 (3.04) | 23.49 (2.89) | 0.60 |
|  |  |  |  |
|  | **N (%)** | **N (%)** |  |
| Farmers | 2295 (49.09) | 42 (51.22) | 0.79 |
| Ever-smoking2 | 3749 (80.28) | 66 (80.49) | 0.99 |
| Ever-alcohol drinking | 3537 (75.95) | 68 (82.93) | 0.16 |
| Education ≥ 9 years | 2164 (46.63) | 28 (34.15) | 0.04 |
| BMI ≥ 25 | 1303 (27.87) | 29 (35.37) | 0.17 |
| Family history of CRC | 43 (0.92) | 0 (0) | - |
| Colon polyps or IBD | 24 (0.51) | 1 (1.22) | 0.39 |
| Diabetes3 | 518 (11.08) | 18 (21.95) | < 0.01 |
| Meat preference | 1055 (58.58) | 27 (72.97) | 0.04 |
| Dietary intake (frequency/week) |  |  |  |
| Red meats ≥ 1 | 1082 (63.95) | 21 (63.64) | 0.69 |
| Vegetables ≥ 2.5 | 1524 (73.06) | 28 (68.29) | 0.86 |
| Fruits ≥ 2.5 | 1473 (63.71) | 25 (55.56) | 0.94 |

Abbreviations: CRC, colorectal cancer; BMI, Body mass index; IBD, irritable bowel syndrome

1. Student’s t tests for continuous variables (age, BMI) and Pearson’s chi-square tests for categorical variables (farmer, cigarettes smoking, alcohol drinking, education ≥ 9 years, family history of CRC, colon polyps or IBD, diabetes, meat preference and dietary intake).

2. Ever-smoking is defined as past and current smoking more or equal to 400 cigarettes.

3. Diabetes was defined as ‘past diagnosis of diabetes mellitus’ or ‘fasting blood sugar > 125 mg/mL’.

**Table S2.** Participant characteristics by PA levels in KMCC population

| Characteristics | NOPA | | | | | | OPA | | |
| --- | --- | --- | --- | --- | --- | --- | --- | --- | --- |
| Vigorous PA | | | Moderate PA | | |
| Low1 | High1 | *p*-value2 | Low1 | High1 | *p*-value2 | Low1 | High1 | *p*-value2 |
|  | **Mean (SD)** | **Mean (SD)** |  | **Mean (SD)** | **Mean (SD)** |  | **Mean (SD)** | **Mean (SD)** |  |
| Age | 52.15 (15.21) | 50.85 (12.56) | 0.05 | 50.71 (15.68) | 55.17 (12.79) | < 0.01 | 50.07 (16.97) | 54.42 (11.81) | < 0.01 |
| BMI | 23.29 (3.06) | 23.59 (2.78) | 0.04 | 23.29 (3.06) | 23.39 (2.98) | 0.33 | 23.40 (3.07) | 23.22 (3.00) | 0.04 |
|  |  |  |  |  |  |  |  |  |  |
|  | **N (%)** | **N (%)** |  | **N (%)** | **N (%)** |  | **N (%)** | **N (%)** |  |
| Farmer | 2113 (49.40) | 182 (45.73) | 0.18 | 1456 (44.42) | 839 (60.06) | < 0.01 | 699 (27.36) | 1596 (75.28) | < 0.01 |
| Ever-smoking3 | 3438 (80.48) | 311 (78.14) | 0.42 | 2604 (79.51) | 1145 (82.08) | 0.12 | 2007 (78.68) | 1742 (82.21) | 0.01 |
| Ever-alcohol drinking | 3244 (76.15) | 293 (73.80) | 0.52 | 2479 (75.97) | 1058 (75.90) | 0.47 | 1930 (75.83) | 1607 (76.09) | 0.98 |
| Education ≥ 9 years | 1933 (45.51) | 231 (58.63) | < 0.01 | 1454 (44.72) | 710 (51.08) | < 0.01 | 1232 (48.71) | 932 (44.13) | < 0.01 |
| Family history of CRC | 38 (0.89) | 5 (1.26) | 0.41 | 28 (0.85) | 15 (1.07) | 0.58 | 24 (0.94) | 19 (0.90) | 1 |
| Colon polyps or IBD | 23 (0.54) | 1 (0.25) | 0.72 | 19 (0.58) | 5 (0.36) | 0.38 | 9 (0.35) | 15 (0.71) | 0.14 |
| Diabetes4 | 470 (10.99) | 48 (12.06) | 0.57 | 351 (10.71) | 167 (11.95) | 0.23 | 297 (11.62) | 221 (10.42) | 0.21 |
| Meat preferring | 993 (58.90) | 62 (53.91) | 0.34 | 695 (57.49) | 360 (60.81) | 0.20 | 585 (57.07) | 470 (60.57) | 0.15 |
| Dietary intake (frequency per week) |  |  |  |  |  |  |  |  |  |
| Red meats≥ 1 | 999 (63.23) | 83 (74.11) | 0.03 | 717 (62.19) | 365 (67.72) | 0.03 | 621 (62.98) | 461 (65.30) | 0.35 |
| Vegetables ≥ 2.5 | 1414 (72.59) | 110 (79.71) | 0.08 | 990 (70.11) | 534 (79.23) | < 0.01 | 808 (69.06) | 716 (78.17) | < 0.01 |
| Fruits ≥ 2.5 | 1364 (63.06) | 109 (73.15) | 0.02 | 948 (60.81) | 525 (69.72) | < 0.01 | 792 (61.59) | 681 (66.37) | 0.02 |

Abbreviations; PA, physical activity; KMCC, Korean Multi-center Cancer Cohort study; NOPA, non-occupational physical activity; OPA, occupational physical activity; BMI, Body mass index; CRC, colorectal cancer; IBD, irritable bowel syndrome

1. Low PA indicates < 7 PA hours per week; high PA indicates ≥ 7 PA hours per week.
2. Student’s t tests for continuous variables (age, BMI) and Pearson’s chi-square tests for categorical variables (farmer, cigarettes smoking, alcohol drinking, education ≥ 9 years, family history of CRC, colon polyps or IBD, diabetes, meat preference and dietary intake).

3. Ever-smoking is defined as past and current smoking more or equal to 400 cigarettes.
4. Diabetes was defined as ‘past diagnosis of diabetes mellitus’ or ‘fasting blood sugar > 125 mg/mL’.

**Table S3.** Participant characteristics by OPA in KMCC population

| Characteristics | MET (min/week) | | | | |
| --- | --- | --- | --- | --- | --- |
| < 300 | 300 – 599 | 600 – 2999 | ≥ 3000 | *p* for trend1 |
|  | **Mean (SD)** | **Mean (SD)** | **Mean (SD)** | **Mean (SD)** |  |
| Age | 51.13 (17.06) | 44.48 (16.81) | 50.82 (15.95) | 54.42 (11.81) | < 0.01 |
| BMI | 23.45 (3.10) | 23.38 (2.98) | 23.25 (3.04) | 23.22 (3.00) | 0.02 |
|  |  |  |  |  |  |
|  | **N (%)** | **N (%)** | **N (%)** | **N (%)** |  |
| Farmer | 321 (19.16) | 103 (26.82) | 275 (55.44) | 1596 (75.28) | < 0.01 |
| Ever-smoking2 | 1310 (78.35) | 302 (78.65) | 395 (79.80) | 1742 (82.21) | < 0.01 |
| Ever-alcohol drinking | 1268 (76.06) | 287 (74.74) | 375 (75.91) | 1607 (76.09) | 0.92 |
| Education ≥ 9 years | 773 (46.68) | 224 (58.79) | 235 (47.76) | 932 (44.13) | 0.03 |
| Family history of CRC | 17 (1.01) | 4 (1.04) | 3 (0.60) | 19 (0.90) | 0.64 |
| Colon polyps or IBD | 6 (0.36) | 0 (0.00) | 3 (0.60) | 15 (0.71) | 0.10 |
| Diabetes3 | 193 (11.52) | 38 (9.90) | 66 (13.31) | 221 (10.42) | 0.41 |
| Meat preferring | 390 (55.16) | 92 (63.01) | 103 (59.88) | 470 (60.57) | 0.05 |
| Dietary intake (frequency per week) |  |  |  |  |  |
| Red meats≥ 1 | 435 (63.32) | 88 (63.31) | 98 (61.25) | 461 (65.30) | 0.48 |
| Vegetables ≥ 2.5 | 534 (68.03) | 114 (67.46) | 160 (74.07) | 716 (78.17) | < 0.01 |
| Fruits ≥ 2.5 | 548 (62.99) | 102 (57.95) | 142 (59.17) | 681 (66.37) | 0.11 |

Abbreviations; OPA, occupational physical activity; KMCC, Korean Multi-center Cancer Cohort study; MET, Metabolic Equivalent of Task; BMI, Body mass index; CRC, colorectal cancer; IBD, irritable bowel syndrome

1. Liner regression for continuous variables (age, BMI) and Cochran–Armitage trend test for categorical variables (farmer, cigarettes smoking, alcohol drinking, education ≥ 9 years, family history of CRC, colon polyps or IBD, diabetes, meat preference and dietary intake).

2. Ever-smoking is defined as past and current smoking more or equal to 400 cigarettes.

3. Diabetes was defined as ‘past diagnosis of diabetes mellitus’ or ‘fasting blood sugar > 125 mg/mL’.

**Table S4.** Distribution of occupation by NOPA percentile groups

| **Occupation** | Cohort N | NOPA | | | |
| --- | --- | --- | --- | --- | --- |
| < 30th percentile (N=1228) | 30-60 percentile (N=1557) | 60-90 percentile (N=1324) | ≥ 90th percentile (N=566) |
|  |  | **N (%)** | **N (%)** | **N (%)** | **N (%)** |
| Farmers | 2,295 | 606 (49.63) | 704 (45.48) | 656 (49.66) | 329 (58.75) |
| Office workers1 | 385 | 88 (7.21) | 155 (10.01) | 114 (8.63) | 28 (5.00) |
| Production workers | 803 | 262 (21.46) | 285 (18.41) | 174 (13.17) | 82 (14.64) |
| Sales and service workers | 308 | 52 (4.26) | 111 (7.17) | 108 (8.18) | 37 (6.61) |
| Others2 | 446 | 114 (9.34) | 164 (10.59) | 120 (9.08) | 48 (8.57) |
| Unemployed | 413 | 99 (8.11) | 129 (8.33) | 149 (11.28) | 36 (6.43) |
| Missing | 25 | 7 | 9 | 3 | 6 |

Abbreviations: NOPA, non-occupational physical activity
1. Office workers include professionals, administrative workers and office staffs.
2. Others include soldiers, students, household workers and other occupations.
